# Supplementary material
Source: PubMed Central journal article supplement (PMC6153296)
Supplement: supp_RA118.003373_Supplemental_Figure_1.pdf [file supp_RA118.003373_Supplemental_Figure_1.pdf]

A

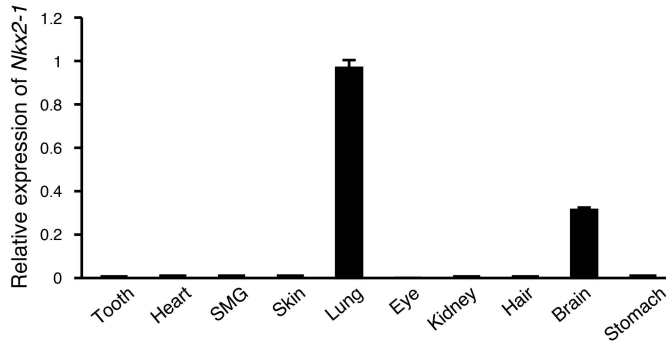

B

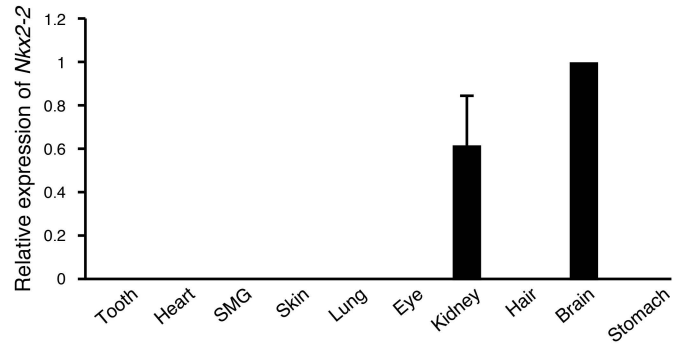

C

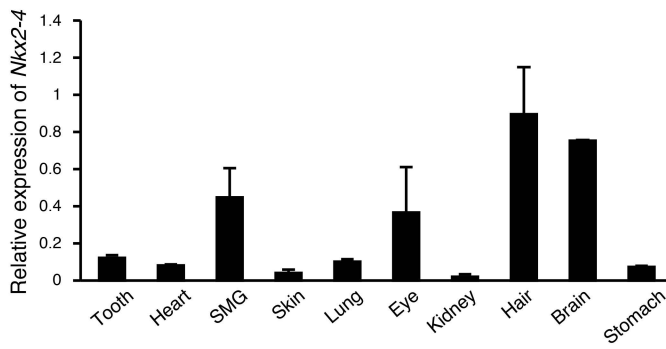

D

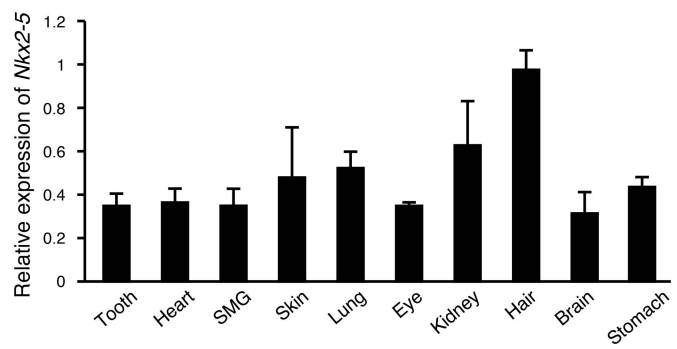

E

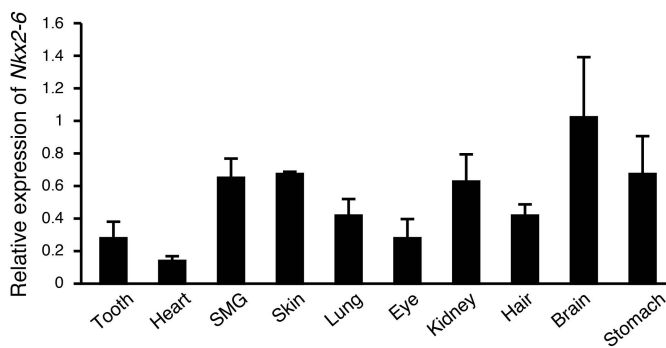

F

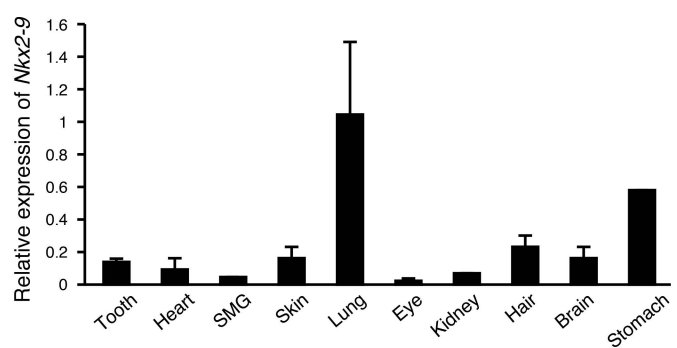

G

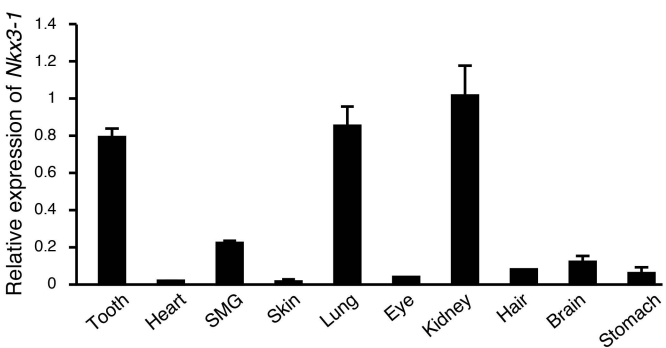

H

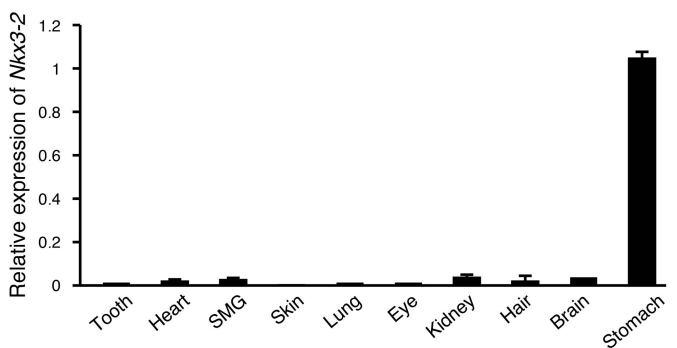

### Supplemental Figure legends

**Supplemental Figure 1.** Expression of NKX-homeodomain factors in different organs. (A) *Nkx2-1*, (B) *Nkx2-2*, (C) *Nkx2-4*, (D) *Nkx2-5*, (E) *Nkx2-6*, (F) *Nkx2-9*, (G) *Nkx3-1*, and (H) *Nkx3-2* expressions were determined in tooth, heart, submandibular gland, skin, lung, eye, kidney, hair, brain, and stomach samples obtained from E14 embryos, with normalization to *Gapdh* mRNA expression. The primers were used as follows: *Nkx2-1*, 5'- cttatggtcggacctggtg -3' and 5'- aaaaagtagaagcgcgtgga -3'; *Nkx2-2*, 5'- ccccatccttccttaaa -3' and 5'- tttgtgttggtcagcgacat -3'; *Nkx2-4*, 5'- cgcttaagcagcagaagta -3' and 5'- ttggcctgctcttcatctt -3'; *Nkx2-5*, 5'- tatggctacaacgcctaccc -3' and 5'- gttcacgaagttgctgttg -3'; *Nkx2-6*, 5'- ctattctcccaggeccaagt -3' and 5'- agatcttgacctgcgtggac -3'; *Nkx2-9*, 5'- tctggtctcctggaactggt -3' and 5'- acctcctgactttggtgtgg -3'; *Nkx3-1*, 5'- ctggcatccatctttctggt -3' and 5'- cttgcttccgactccttgac -3'; and *Nkx3-2*, 5'- tcagaaccgtcgctacaaga -3' and 5'- tctccggcaaatactgtct -3'. Error bars represent the mean  $\pm$  S.D.
